# Supplementary material
Source: publisher figshare collection journal article supplement (https://acs.figshare.com/ndownloader/files/5725893)
Supplement: Supplementary file 1 [file 5725893]

# ja012760v.cif
 
data_Compound 1 in the manuscript 

#  1. SUBMISSION DETAILS

_publ_contact_author              (Ingo Krossing(
_publ_contact_author_phone        (0721 608 29 51(
_publ_contact_author_fax          (0721 608 49 52(
_publ_contact_author_email        (krossing@chemie.uni-karlsruhe.de( 
_publ_requested_journal           (J. Am. Chem. Soc.(

_publ_contact_letter
;
CIF files for the JACS submission JA012760V-19-345
;

#  3. TITLE AND AUTHOR LIST

_publ_section_title
;
Extending the Coordination Chemistry of Molecular P4S3: 
The Polymeric Ag(P4S3)+ and Ag(P4S3)2+ Cations. 
;

loop_
_publ_author_name (Ingo Krossing(
_publ_author_address
;
      Institut f\"ur anorganische Chemie
      Universit\"at Karlsruhe
      Engesserstr. Geb. 30.45
      Bundesrepublik Deutschland
;
_publ_manuscript_creation         'RTF-File created by CIF6 (H.Schwenk 1996)'
  
_audit_creation_method            SHELXL-97 
_chemical_name_systematic 
; 
 ? 
; 
_chemical_name_common             ? 
_chemical_melting_point           ? 
_chemical_formula_moiety          ? 
_chemical_formula_sum 
 'C12 H4 Ag Al F24 O4 P4 S3' 
_chemical_formula_weight          1023.06 
 
loop_ 
 _atom_type_symbol 
 _atom_type_description 
 _atom_type_scat_dispersion_real 
 _atom_type_scat_dispersion_imag 
 _atom_type_scat_source 
 'C'  'C'   0.0033   0.0016 
 'International Tables Vol C Tables 4.2.6.8 and 6.1.1.4' 
 'H'  'H'   0.0000   0.0000 
 'International Tables Vol C Tables 4.2.6.8 and 6.1.1.4' 
 'O'  'O'   0.0106   0.0060 
 'International Tables Vol C Tables 4.2.6.8 and 6.1.1.4' 
 'F'  'F'   0.0171   0.0103 
 'International Tables Vol C Tables 4.2.6.8 and 6.1.1.4' 
 'Al'  'Al'   0.0645   0.0514 
 'International Tables Vol C Tables 4.2.6.8 and 6.1.1.4' 
 'P'  'P'   0.1023   0.0942 
 'International Tables Vol C Tables 4.2.6.8 and 6.1.1.4' 
 'S'  'S'   0.1246   0.1234 
 'International Tables Vol C Tables 4.2.6.8 and 6.1.1.4' 
 'Ag'  'Ag'  -0.8971   1.1015 
 'International Tables Vol C Tables 4.2.6.8 and 6.1.1.4' 
 
_symmetry_cell_setting            Monoclinic
_symmetry_space_group_name_H-M    P2(1)/n
 
loop_ 
 _symmetry_equiv_pos_as_xyz 
 'x, y, z' 
 '-x+1/2, y+1/2, -z+1/2' 
 '-x, -y, -z' 
 'x-1/2, -y-1/2, z-1/2' 
 
_cell_length_a                    16.680(3) 
_cell_length_b                    11.185(2) 
_cell_length_c                    18.324(4) 
_cell_angle_alpha                 90.00 
_cell_angle_beta                  110.38(3) 
_cell_angle_gamma                 90.00 
_cell_volume                      3204.6(11) 
_cell_formula_units_Z             4 
_cell_measurement_temperature     175(2) 
_cell_measurement_reflns_used     5000 
_cell_measurement_theta_min       2 
_cell_measurement_theta_max       26 
 
_exptl_crystal_description        block 
_exptl_crystal_colour             colorless 
_exptl_crystal_size_max           0.6 
_exptl_crystal_size_mid           0.4 
_exptl_crystal_size_min           0.2 
_exptl_crystal_density_meas       ? 
_exptl_crystal_density_diffrn     2.120 
_exptl_crystal_density_method     'not measured' 
_exptl_crystal_F_000              1968 
_exptl_absorpt_coefficient_mu     1.215 
_exptl_absorpt_correction_type    numerical 
_exptl_absorpt_correction_T_min   0.5356 
_exptl_absorpt_correction_T_max   0.6718
_exptl_absorpt_process_details    numerical 
 
_exptl_special_details 
; 
 Crystal mounted in PFE oil. 
; 
 
_diffrn_ambient_temperature       175(2) 
_diffrn_radiation_wavelength      0.71073 
_diffrn_radiation_type            MoK\a 
_diffrn_radiation_source          'fine-focus sealed tube' 
_diffrn_radiation_monochromator   graphite 
_diffrn_measurement_device_type   STOE IPDS 
_diffrn_measurement_method        Image Plate Technique 
_diffrn_detector_area_resol_mean  - 
_diffrn_standards_number          - 
_diffrn_standards_interval_count  - 
_diffrn_standards_interval_time   - 
_diffrn_standards_decay_%         - 
_diffrn_reflns_number             16899 
_diffrn_reflns_av_R_equivalents   0.0538 
_diffrn_reflns_av_sigmaI/netI     0.0386 
_diffrn_reflns_limit_h_min        -19 
_diffrn_reflns_limit_h_max        19 
_diffrn_reflns_limit_k_min        -13 
_diffrn_reflns_limit_k_max        11 
_diffrn_reflns_limit_l_min        -21 
_diffrn_reflns_limit_l_max        21 
_diffrn_reflns_theta_min          6.81 
_diffrn_reflns_theta_max          24.71 
_reflns_number_total              5335 
_reflns_number_gt                 4144 
_reflns_threshold_expression      >2sigma(I) 
 
_computing_data_collection        EXPOSE 
_computing_cell_refinement        CELL 
_computing_data_reduction         INTEGRATE 
_computing_structure_solution     'SHELXS-97 (Sheldrick, 1990)' 
_computing_structure_refinement   'SHELXL-97 (Sheldrick, 1997)' 
_computing_molecular_graphics     RESVIEW and XP 
_computing_publication_material   SHELXL 
 
_refine_special_details 
; 
 Refinement of F^2^ against ALL reflections.  The weighted R-factor wR and 
 goodness of fit S are based on F^2^, conventional R-factors R are based 
 on F, with F set to zero for negative F^2^. The threshold expression of 
 F^2^ > 2sigma(F^2^) is used only for calculating R-factors(gt) etc. and is 
 not relevant to the choice of reflections for refinement.  R-factors based 
 on F^2^ are statistically about twice as large as those based on F, and R- 
 factors based on ALL data will be even larger. 
; 
 
_refine_ls_structure_factor_coef  Fsqd  
_refine_ls_matrix_type            full 
_refine_ls_weighting_scheme       calc  
_refine_ls_weighting_details 
 'calc w=1/[\s^2^(Fo^2^)+(0.0949P)^2^+1.2237P] where P=(Fo^2^+2Fc^2^)/3' 
_atom_sites_solution_primary      direct 
_atom_sites_solution_secondary    difmap 
_atom_sites_solution_hydrogens    geom 
_refine_ls_hydrogen_treatment     mixed 
_refine_ls_extinction_method      none 
_refine_ls_extinction_coef        ? 
_refine_ls_number_reflns          5335 
_refine_ls_number_parameters      506 
_refine_ls_number_restraints      13 
_refine_ls_R_factor_all           0.0640 
_refine_ls_R_factor_gt            0.0504 
_refine_ls_wR_factor_ref          0.1444 
_refine_ls_wR_factor_gt           0.1363 
_refine_ls_goodness_of_fit_ref    1.033 
_refine_ls_restrained_S_all       1.037 
_refine_ls_shift/su_max           0.063 
_refine_ls_shift/su_mean          0.002 
 
loop_ 
 _atom_site_label 
 _atom_site_type_symbol 
 _atom_site_fract_x 
 _atom_site_fract_y 
 _atom_site_fract_z 
 _atom_site_U_iso_or_equiv 
 _atom_site_adp_type 
 _atom_site_occupancy 
 _atom_site_symmetry_multiplicity 
 _atom_site_calc_flag 
 _atom_site_refinement_flags 
 _atom_site_disorder_assembly 
 _atom_site_disorder_group 
Ag1 Ag 0.78270(2) 0.39507(3) 0.624515(18) 0.05875(11) Uani 1 1 d . . . 
P1 P 0.93084(12) 0.6058(2) 0.76562(12) 0.0770(6) Uani 0.6860(19) 1 d P A 1 
P2 P 0.76658(12) 0.54511(19) 0.81921(10) 0.0676(5) Uani 0.6860(19) 1 d P A 1 
P3 P 0.7863(2) 0.7391(4) 0.8172(2) 0.0765(11) Uani 0.6860(19) 1 d P . 1 
P4 P 0.71919(18) 0.6408(3) 0.70204(15) 0.0569(6) Uani 0.6860(19) 1 d P A 1 
S1 S 0.82116(11) 0.61510(14) 0.66066(9) 0.0600(4) Uani 0.6860(19) 1 d P A 1 
S2 S 0.8766(2) 0.4763(3) 0.82504(14) 0.0777(9) Uani 0.6860(19) 1 d P A 1 
S3 S 0.9134(2) 0.7705(3) 0.81754(17) 0.0783(8) Uani 0.6860(19) 1 d P A 1 
P1A P 0.8161(2) 0.5525(3) 0.70927(18) 0.0488(8) Uani 0.3140(19) 1 d P A 2 
P2A P 0.7836(5) 0.7548(7) 0.8069(4) 0.0538(15) Uani 0.3140(19) 1 d P . 2 
P3A P 0.9077(6) 0.7581(12) 0.8128(7) 0.147(4) Uani 0.3140(19) 1 d P A 2 
P4A P 0.8878(3) 0.6329(4) 0.8910(2) 0.0732(12) Uani 0.3140(19) 1 d P A 2 
S1A S 0.7161(5) 0.6525(9) 0.7212(4) 0.085(2) Uani 0.3140(19) 1 d P A 2 
S2A S 0.8929(4) 0.4937(8) 0.8249(5) 0.089(3) Uani 0.3140(19) 1 d P A 2 
S3A S 0.9091(3) 0.6754(5) 0.7129(3) 0.0851(13) Uani 0.3140(19) 1 d P A 2 
Al1 Al 0.78503(7) 0.22235(10) 0.48455(7) 0.0469(3) Uani 1 1 d . . . 
O1 O 0.86811(18) 0.2692(3) 0.56951(18) 0.0619(8) Uani 1 1 d . A . 
O2 O 0.7504(2) 0.0817(3) 0.49759(19) 0.0690(8) Uani 1 1 d . A . 
O3 O 0.8008(2) 0.2248(3) 0.3975(2) 0.0786(9) Uani 1 1 d . A . 
O4 O 0.71198(16) 0.3313(2) 0.49030(15) 0.0497(6) Uani 1 1 d . A . 
C1 C 0.9536(3) 0.2374(4) 0.6031(3) 0.0607(11) Uani 1 1 d . . . 
H1A H 0.9666 0.1763 0.5705 0.073 Uiso 1 1 calc R A . 
C2 C 1.0086(3) 0.3477(6) 0.6052(4) 0.0862(17) Uani 1 1 d . A . 
C3 C 0.9703(3) 0.1851(6) 0.6841(3) 0.0789(15) Uani 1 1 d . A . 
C4 C 0.7422(4) -0.0218(4) 0.4539(3) 0.0703(12) Uani 1 1 d . . . 
H4A H 0.7428 0.0006 0.4024 0.084 Uiso 1 1 calc R A . 
C5 C 0.6562(5) -0.0790(6) 0.4434(5) 0.110(2) Uani 1 1 d . A . 
C6 C 0.8197(7) -0.1006(7) 0.4932(6) 0.133(3) Uani 1 1 d . A . 
C7 C 0.8507(3) 0.2744(6) 0.3605(3) 0.0818(16) Uani 1 1 d D . . 
H7A H 0.8824 0.3404 0.3931 0.098 Uiso 1 1 calc R A . 
C8 C 0.9147(4) 0.1846(7) 0.3558(4) 0.167(4) Uani 1 1 d D A . 
C9 C 0.7994(4) 0.3261(6) 0.2831(4) 0.132(3) Uani 1 1 d D A . 
C10 C 0.6462(3) 0.3855(4) 0.4303(2) 0.0526(10) Uani 1 1 d . . . 
H10A H 0.6460 0.3521 0.3808 0.063 Uiso 1 1 calc R A . 
C11 C 0.5612(3) 0.3577(6) 0.4384(4) 0.0820(15) Uani 1 1 d . A . 
C12 C 0.6633(4) 0.5193(5) 0.4301(3) 0.0860(17) Uani 1 1 d . A . 
F1 F 1.0907(2) 0.3290(5) 0.6375(3) 0.1171(14) Uani 1 1 d . . . 
F2 F 0.9947(3) 0.3836(5) 0.5323(3) 0.1440(19) Uani 1 1 d . . . 
F3 F 0.9897(3) 0.4379(4) 0.6434(4) 0.1357(18) Uani 1 1 d . . . 
F4 F 0.9481(3) 0.2593(4) 0.73013(18) 0.1155(14) Uani 1 1 d . . . 
F5 F 0.9237(3) 0.0874(4) 0.6779(3) 0.1155(13) Uani 1 1 d . . . 
F6 F 1.0505(2) 0.1537(4) 0.7203(2) 0.1101(12) Uani 1 1 d . . . 
F7 F 0.6581(4) -0.1165(5) 0.5164(3) 0.174(2) Uani 1 1 d . . . 
F8 F 0.6412(3) -0.1762(4) 0.4011(3) 0.1320(15) Uani 1 1 d . . . 
F9 F 0.5956(3) -0.0087(6) 0.4166(6) 0.233(5) Uani 1 1 d . . . 
F10 F 0.8105(5) -0.2044(4) 0.4528(4) 0.182(2) Uani 1 1 d . . . 
F11 F 0.8901(4) -0.0418(7) 0.4951(5) 0.182(3) Uani 1 1 d . . . 
F12 F 0.8323(6) -0.1290(5) 0.5626(4) 0.184(3) Uani 1 1 d . . . 
F13 F 0.9631(4) 0.1597(8) 0.4286(4) 0.236(4) Uani 1 1 d D . . 
F14 F 0.9626(4) 0.2275(9) 0.3181(4) 0.302(5) Uani 1 1 d D . . 
F15 F 0.8788(6) 0.0842(7) 0.3220(5) 0.275(5) Uani 1 1 d D . . 
F16 F 0.7364(3) 0.3955(6) 0.2857(3) 0.175(3) Uani 1 1 d D . . 
F17 F 0.8448(3) 0.3898(5) 0.2509(3) 0.156(2) Uani 1 1 d D . . 
F18 F 0.7598(4) 0.2400(8) 0.2329(3) 0.227(4) Uani 1 1 d D . . 
F19 F 0.4964(2) 0.4170(5) 0.3852(2) 0.1201(14) Uani 1 1 d . . . 
F20 F 0.5601(2) 0.3890(4) 0.5090(2) 0.1116(13) Uani 1 1 d . . . 
F21 F 0.5438(3) 0.2448(4) 0.4264(4) 0.1392(18) Uani 1 1 d . . . 
F22 F 0.6593(3) 0.5733(3) 0.4930(2) 0.1226(15) Uani 1 1 d . . . 
F23 F 0.6087(4) 0.5750(3) 0.3683(2) 0.1316(17) Uani 1 1 d . . . 
F24 F 0.7402(4) 0.5390(4) 0.4314(4) 0.1507(19) Uani 1 1 d . . . 
 
loop_ 
 _atom_site_aniso_label 
 _atom_site_aniso_U_11 
 _atom_site_aniso_U_22 
 _atom_site_aniso_U_33 
 _atom_site_aniso_U_23 
 _atom_site_aniso_U_13 
 _atom_site_aniso_U_12 
Ag1 0.0732(2) 0.05213(19) 0.04961(18) -0.00064(13) 0.01971(15) 0.00550(15) 
P1 0.0561(9) 0.1085(16) 0.0725(11) -0.0298(11) 0.0299(8) -0.0213(10) 
P2 0.0688(10) 0.0865(13) 0.0549(8) -0.0048(8) 0.0307(8) -0.0140(9) 
P3 0.0730(16) 0.089(2) 0.0639(15) -0.0196(14) 0.0196(13) -0.0159(15) 
P4 0.0564(10) 0.0631(12) 0.0490(11) -0.0066(9) 0.0157(8) -0.0056(9) 
S1 0.0831(10) 0.0544(9) 0.0494(8) -0.0068(7) 0.0318(7) -0.0150(8) 
S2 0.115(2) 0.0771(15) 0.0411(10) -0.0008(9) 0.0275(11) -0.0108(14) 
S3 0.0819(15) 0.0805(14) 0.0748(13) -0.0296(12) 0.0304(12) -0.0393(12) 
P1A 0.0537(17) 0.0492(17) 0.0407(15) -0.0092(14) 0.0128(13) -0.0037(14) 
P2A 0.066(3) 0.049(3) 0.054(3) -0.010(2) 0.031(2) 0.007(2) 
P3A 0.094(5) 0.182(7) 0.188(7) -0.151(6) 0.076(5) -0.078(5) 
P4A 0.085(3) 0.072(2) 0.0476(19) -0.0122(18) 0.0047(19) 0.005(2) 
S1A 0.057(3) 0.121(5) 0.067(4) -0.031(3) 0.009(2) 0.005(3) 
S2A 0.053(3) 0.099(5) 0.095(5) -0.002(3) 0.000(2) 0.030(3) 
S3A 0.097(3) 0.089(3) 0.084(3) -0.014(2) 0.051(2) -0.027(2) 
Al1 0.0490(6) 0.0418(6) 0.0474(6) -0.0016(5) 0.0137(5) 0.0043(5) 
O1 0.0467(14) 0.0619(17) 0.0663(17) -0.0123(14) 0.0062(13) 0.0125(13) 
O2 0.100(2) 0.0434(15) 0.0643(18) -0.0050(13) 0.0301(17) -0.0049(16) 
O3 0.095(2) 0.085(2) 0.0720(19) -0.0103(17) 0.0499(18) -0.0096(19) 
O4 0.0497(14) 0.0493(15) 0.0423(13) -0.0025(11) 0.0061(11) 0.0112(12) 
C1 0.049(2) 0.068(3) 0.059(2) -0.003(2) 0.0096(19) 0.013(2) 
C2 0.056(3) 0.095(4) 0.095(4) -0.004(3) 0.010(3) -0.003(3) 
C3 0.063(3) 0.101(4) 0.067(3) 0.006(3) 0.015(2) 0.024(3) 
C4 0.094(3) 0.050(2) 0.070(3) -0.012(2) 0.032(3) -0.003(2) 
C5 0.137(5) 0.083(4) 0.138(5) -0.052(4) 0.082(4) -0.036(4) 
C6 0.192(8) 0.076(4) 0.153(7) 0.026(4) 0.089(6) 0.051(5) 
C7 0.073(3) 0.115(4) 0.064(3) -0.001(3) 0.033(2) -0.007(3) 
C8 0.142(5) 0.259(13) 0.140(6) 0.081(7) 0.100(5) 0.084(7) 
C9 0.098(5) 0.218(10) 0.086(4) 0.027(5) 0.040(4) -0.012(6) 
C10 0.058(2) 0.049(2) 0.0394(18) -0.0018(16) 0.0034(17) 0.0114(18) 
C11 0.064(3) 0.087(4) 0.090(4) -0.004(3) 0.020(3) 0.014(3) 
C12 0.105(4) 0.050(3) 0.077(3) 0.008(2) 0.000(3) 0.010(3) 
F1 0.0578(17) 0.153(4) 0.134(3) -0.005(3) 0.0244(19) -0.004(2) 
F2 0.136(3) 0.142(4) 0.123(3) 0.045(3) 0.006(3) -0.047(3) 
F3 0.085(2) 0.098(3) 0.211(5) -0.054(3) 0.034(3) -0.019(2) 
F4 0.111(2) 0.164(4) 0.0565(16) -0.011(2) 0.0117(17) 0.054(3) 
F5 0.121(3) 0.124(3) 0.100(3) 0.027(2) 0.036(2) -0.011(3) 
F6 0.0723(18) 0.157(3) 0.086(2) 0.030(2) 0.0090(16) 0.046(2) 
F7 0.255(5) 0.164(4) 0.164(4) -0.071(3) 0.151(4) -0.100(4) 
F8 0.193(4) 0.084(2) 0.132(3) -0.048(2) 0.073(3) -0.056(3) 
F9 0.081(3) 0.133(4) 0.439(12) -0.114(6) 0.031(5) -0.004(3) 
F10 0.251(6) 0.087(3) 0.216(6) -0.019(3) 0.094(5) 0.065(4) 
F11 0.113(4) 0.176(6) 0.250(7) 0.042(5) 0.054(4) 0.036(4) 
F12 0.278(8) 0.114(3) 0.141(4) 0.047(3) 0.049(5) 0.078(4) 
F13 0.154(4) 0.374(12) 0.199(6) 0.076(7) 0.085(4) 0.134(6) 
F14 0.225(4) 0.451(14) 0.344(7) 0.194(8) 0.241(4) 0.160(7) 
F15 0.372(10) 0.215(7) 0.317(9) -0.094(7) 0.219(8) 0.048(8) 
F16 0.125(3) 0.264(7) 0.133(4) 0.093(4) 0.043(3) 0.073(4) 
F17 0.144(3) 0.230(6) 0.106(3) 0.057(3) 0.057(3) -0.016(4) 
F18 0.150(4) 0.428(12) 0.085(3) -0.069(5) 0.020(3) -0.106(6) 
F19 0.0635(19) 0.168(4) 0.104(3) 0.008(3) -0.0021(18) 0.039(2) 
F20 0.095(2) 0.159(4) 0.095(2) 0.035(2) 0.0512(18) 0.055(2) 
F21 0.088(2) 0.102(3) 0.217(5) 0.004(3) 0.040(3) -0.028(2) 
F22 0.185(4) 0.0596(18) 0.091(2) -0.0213(17) 0.006(3) 0.022(2) 
F23 0.186(4) 0.071(2) 0.091(2) 0.0216(18) -0.011(3) 0.026(3) 
F24 0.143(4) 0.095(3) 0.204(5) 0.028(3) 0.048(4) -0.044(3) 
 
_geom_special_details 
; 
 All esds (except the esd in the dihedral angle between two l.s. planes) 
 are estimated using the full covariance matrix.  The cell esds are taken 
 into account individually in the estimation of esds in distances, angles 
 and torsion angles; correlations between esds in cell parameters are only 
 used when they are defined by crystal symmetry.  An approximate (isotropic) 
 treatment of cell esds is used for estimating esds involving l.s. planes. 
; 
 
loop_ 
 _geom_bond_atom_site_label_1 
 _geom_bond_atom_site_label_2 
 _geom_bond_distance 
 _geom_bond_site_symmetry_2 
 _geom_bond_publ_flag 
Ag1 P1A 2.285(3) . ? 
Ag1 O4 2.435(3) . ? 
Ag1 O1 2.455(3) . ? 
Ag1 P2A 2.497(7) 2_646 ? 
Ag1 P3 2.523(4) 2_646 ? 
Ag1 S1 2.5712(17) . ? 
P1 S3 2.139(4) . ? 
P1 S1 2.146(3) . ? 
P1 S2 2.189(4) . ? 
P2 S2 1.959(4) . ? 
P2 P3 2.197(5) . ? 
P2 P4 2.280(3) . ? 
P3 S3 2.146(5) . ? 
P3 P4 2.295(5) . ? 
P3 Ag1 2.523(4) 2_656 ? 
P4 S1 2.109(4) . ? 
P1A S3A 2.056(6) . ? 
P1A S1A 2.082(9) . ? 
P1A S2A 2.162(8) . ? 
P2A S1A 1.952(10) . ? 
P2A P3A 2.035(13) . ? 
P2A P4A 2.321(8) . ? 
P2A Ag1 2.497(7) 2_656 ? 
P3A S3A 2.058(12) . ? 
P3A P4A 2.111(16) . ? 
P4A S2A 1.993(10) . ? 
Al1 O3 1.705(3) . ? 
Al1 O2 1.721(3) . ? 
Al1 O4 1.752(3) . ? 
Al1 O1 1.765(3) . ? 
O1 C1 1.388(5) . ? 
O2 C4 1.386(6) . ? 
O3 C7 1.361(6) . ? 
O4 C10 1.393(5) . ? 
C1 C3 1.528(7) . ? 
C1 C2 1.530(8) . ? 
C2 F1 1.306(6) . ? 
C2 F3 1.328(8) . ? 
C2 F2 1.335(8) . ? 
C3 F6 1.317(6) . ? 
C3 F5 1.322(7) . ? 
C3 F4 1.325(7) . ? 
C4 C5 1.521(9) . ? 
C4 C6 1.523(11) . ? 
C5 F9 1.238(10) . ? 
C5 F8 1.309(7) . ? 
C5 F7 1.391(10) . ? 
C6 F12 1.255(11) . ? 
C6 F11 1.337(12) . ? 
C6 F10 1.356(10) . ? 
C7 C8 1.491(8) . ? 
C7 C9 1.495(7) . ? 
C8 F14 1.314(7) . ? 
C8 F15 1.321(7) . ? 
C8 F13 1.327(7) . ? 
C9 F17 1.319(6) . ? 
C9 F16 1.320(6) . ? 
C9 F18 1.335(7) . ? 
C10 C11 1.509(7) . ? 
C10 C12 1.524(7) . ? 
C11 F21 1.298(8) . ? 
C11 F20 1.346(7) . ? 
C11 F19 1.350(7) . ? 
C12 F24 1.293(9) . ? 
C12 F22 1.323(7) . ? 
C12 F23 1.335(7) . ? 
 
loop_ 
 _geom_angle_atom_site_label_1 
 _geom_angle_atom_site_label_2 
 _geom_angle_atom_site_label_3 
 _geom_angle 
 _geom_angle_site_symmetry_1 
 _geom_angle_site_symmetry_3 
 _geom_angle_publ_flag 
P1A Ag1 O4 146.11(11) . . ? 
P1A Ag1 O1 132.99(11) . . ? 
O4 Ag1 O1 64.13(9) . . ? 
P1A Ag1 P2A 100.8(2) . 2_646 ? 
O4 Ag1 P2A 100.41(19) . 2_646 ? 
O1 Ag1 P2A 105.6(2) . 2_646 ? 
P1A Ag1 P3 106.52(13) . 2_646 ? 
O4 Ag1 P3 95.34(11) . 2_646 ? 
O1 Ag1 P3 101.12(13) . 2_646 ? 
P2A Ag1 P3 5.7(3) 2_646 2_646 ? 
P1A Ag1 S1 26.79(9) . . ? 
O4 Ag1 S1 122.03(7) . . ? 
O1 Ag1 S1 121.74(9) . . ? 
P2A Ag1 S1 125.91(19) 2_646 . ? 
P3 Ag1 S1 131.49(10) 2_646 . ? 
S3 P1 S1 98.71(13) . . ? 
S3 P1 S2 101.83(14) . . ? 
S1 P1 S2 96.13(11) . . ? 
S2 P2 P3 104.27(17) . . ? 
S2 P2 P4 104.30(13) . . ? 
P3 P2 P4 61.66(13) . . ? 
S3 P3 P2 108.4(2) . . ? 
S3 P3 P4 104.2(2) . . ? 
P2 P3 P4 60.95(13) . . ? 
S3 P3 Ag1 118.76(19) . 2_656 ? 
P2 P3 Ag1 125.7(2) . 2_656 ? 
P4 P3 Ag1 124.91(17) . 2_656 ? 
S1 P4 P2 102.47(13) . . ? 
S1 P4 P3 101.52(16) . . ? 
P2 P4 P3 57.39(13) . . ? 
P4 S1 P1 103.11(11) . . ? 
P4 S1 Ag1 93.61(10) . . ? 
P1 S1 Ag1 104.07(10) . . ? 
P2 S2 P1 104.73(17) . . ? 
P1 S3 P3 98.34(18) . . ? 
S3A P1A S1A 105.1(3) . . ? 
S3A P1A S2A 89.4(3) . . ? 
S1A P1A S2A 106.5(3) . . ? 
S3A P1A Ag1 122.7(2) . . ? 
S1A P1A Ag1 118.1(3) . . ? 
S2A P1A Ag1 110.7(3) . . ? 
S1A P2A P3A 110.1(5) . . ? 
S1A P2A P4A 106.2(4) . . ? 
P3A P2A P4A 57.5(5) . . ? 
S1A P2A Ag1 122.7(4) . 2_656 ? 
P3A P2A Ag1 125.6(4) . 2_656 ? 
P4A P2A Ag1 113.3(3) . 2_656 ? 
P2A P3A S3A 105.7(5) . . ? 
P2A P3A P4A 68.1(5) . . ? 
S3A P3A P4A 111.0(6) . . ? 
S2A P4A P3A 93.2(4) . . ? 
S2A P4A P2A 103.6(3) . . ? 
P3A P4A P2A 54.4(4) . . ? 
P2A S1A P1A 98.1(4) . . ? 
P4A S2A P1A 102.8(4) . . ? 
P1A S3A P3A 95.0(4) . . ? 
O3 Al1 O2 108.27(18) . . ? 
O3 Al1 O4 112.48(17) . . ? 
O2 Al1 O4 110.69(17) . . ? 
O3 Al1 O1 119.38(18) . . ? 
O2 Al1 O1 110.33(17) . . ? 
O4 Al1 O1 95.12(14) . . ? 
C1 O1 Al1 133.2(3) . . ? 
C1 O1 Ag1 128.2(3) . . ? 
Al1 O1 Ag1 98.21(12) . . ? 
C4 O2 Al1 130.8(3) . . ? 
C7 O3 Al1 142.5(4) . . ? 
C10 O4 Al1 128.9(2) . . ? 
C10 O4 Ag1 129.9(2) . . ? 
Al1 O4 Ag1 99.33(11) . . ? 
O1 C1 C3 109.9(4) . . ? 
O1 C1 C2 108.6(4) . . ? 
C3 C1 C2 112.3(4) . . ? 
F1 C2 F3 106.7(5) . . ? 
F1 C2 F2 107.0(5) . . ? 
F3 C2 F2 108.0(6) . . ? 
F1 C2 C1 114.1(5) . . ? 
F3 C2 C1 112.0(5) . . ? 
F2 C2 C1 108.9(5) . . ? 
F6 C3 F5 106.6(5) . . ? 
F6 C3 F4 107.8(5) . . ? 
F5 C3 F4 106.6(5) . . ? 
F6 C3 C1 113.7(4) . . ? 
F5 C3 C1 109.3(4) . . ? 
F4 C3 C1 112.5(5) . . ? 
O2 C4 C5 108.9(4) . . ? 
O2 C4 C6 108.3(5) . . ? 
C5 C4 C6 115.1(6) . . ? 
F9 C5 F8 109.3(8) . . ? 
F9 C5 F7 108.4(8) . . ? 
F8 C5 F7 104.8(6) . . ? 
F9 C5 C4 112.7(6) . . ? 
F8 C5 C4 113.7(6) . . ? 
F7 C5 C4 107.5(6) . . ? 
F12 C6 F11 105.2(10) . . ? 
F12 C6 F10 106.4(7) . . ? 
F11 C6 F10 111.6(8) . . ? 
F12 C6 C4 116.1(8) . . ? 
F11 C6 C4 108.8(6) . . ? 
F10 C6 C4 108.8(8) . . ? 
O3 C7 C8 109.2(5) . . ? 
O3 C7 C9 112.5(4) . . ? 
C8 C7 C9 113.0(5) . . ? 
F14 C8 F15 108.9(6) . . ? 
F14 C8 F13 109.6(6) . . ? 
F15 C8 F13 108.1(6) . . ? 
F14 C8 C7 111.3(6) . . ? 
F15 C8 C7 112.5(6) . . ? 
F13 C8 C7 106.2(6) . . ? 
F17 C9 F16 106.6(5) . . ? 
F17 C9 F18 107.7(5) . . ? 
F16 C9 F18 103.9(5) . . ? 
F17 C9 C7 113.8(5) . . ? 
F16 C9 C7 113.1(5) . . ? 
F18 C9 C7 110.9(6) . . ? 
O4 C10 C11 110.0(4) . . ? 
O4 C10 C12 109.4(4) . . ? 
C11 C10 C12 112.7(5) . . ? 
F21 C11 F20 109.8(6) . . ? 
F21 C11 F19 106.3(5) . . ? 
F20 C11 F19 107.0(4) . . ? 
F21 C11 C10 110.2(5) . . ? 
F20 C11 C10 111.6(5) . . ? 
F19 C11 C10 111.8(5) . . ? 
F24 C12 F22 104.9(6) . . ? 
F24 C12 F23 108.3(6) . . ? 
F22 C12 F23 107.5(5) . . ? 
F24 C12 C10 110.6(5) . . ? 
F22 C12 C10 112.4(5) . . ? 
F23 C12 C10 112.8(5) . . ? 
 
_diffrn_measured_fraction_theta_max    0.977 
_diffrn_reflns_theta_full              24.71 
_diffrn_measured_fraction_theta_full   0.977 
_refine_diff_density_max    0.847 
_refine_diff_density_min   -0.683 
_refine_diff_density_rms    0.081 

#===END

data_Compound 2 in the manuscript 

#  1. SUBMISSION DETAILS

_publ_contact_author              (Ingo Krossing(
_publ_contact_author_phone        (0721 608 29 51(
_publ_contact_author_fax          (0721 608 49 52(
_publ_contact_author_email        (krossing@chemie.uni-karlsruhe.de( 
_publ_requested_journal           (J. Am. Chem. Soc.(

_publ_contact_letter
;
CIF files for the JACS submission JA012760V-19-345
;

#  3. TITLE AND AUTHOR LIST

_publ_section_title
;
Extending the Coordination Chemistry of Molecular P4S3: 
The Polymeric Ag(P4S3)+ and Ag(P4S3)2+ Cations. 
;

loop_
_publ_author_name (Ingo Krossing(
_publ_author_address
;
      Institut f\"ur anorganische Chemie
      Universit\"at Karlsruhe
      Engesserstr. Geb. 30.45
      Bundesrepublik Deutschland
;
 
_audit_creation_method            SHELXL-97 
_chemical_name_systematic 
; 
 ? 
; 
_chemical_name_common             ? 
_chemical_melting_point           ? 
_chemical_formula_moiety          ? 
_chemical_formula_sum 
 'C17 Ag Al F36 O4 P8 S8' 
_chemical_formula_weight          1591.26 
 
loop_ 
 _atom_type_symbol 
 _atom_type_description 
 _atom_type_scat_dispersion_real 
 _atom_type_scat_dispersion_imag 
 _atom_type_scat_source 
 'C'  'C'   0.0033   0.0016 
 'International Tables Vol C Tables 4.2.6.8 and 6.1.1.4' 
 'O'  'O'   0.0106   0.0060 
 'International Tables Vol C Tables 4.2.6.8 and 6.1.1.4' 
 'F'  'F'   0.0171   0.0103 
 'International Tables Vol C Tables 4.2.6.8 and 6.1.1.4' 
 'Al'  'Al'   0.0645   0.0514 
 'International Tables Vol C Tables 4.2.6.8 and 6.1.1.4' 
 'P'  'P'   0.1023   0.0942 
 'International Tables Vol C Tables 4.2.6.8 and 6.1.1.4' 
 'S'  'S'   0.1246   0.1234 
 'International Tables Vol C Tables 4.2.6.8 and 6.1.1.4' 
 'Ag'  'Ag'  -0.8971   1.1015 
 'International Tables Vol C Tables 4.2.6.8 and 6.1.1.4' 
 
_symmetry_cell_setting            monoclinic
_symmetry_space_group_name_H-M    P2(1)/n
 
loop_ 
 _symmetry_equiv_pos_as_xyz 
 'x, y, z' 
 '-x+1/2, y+1/2, -z+1/2' 
 '-x, -y, -z' 
 'x-1/2, -y-1/2, z-1/2' 
 
_cell_length_a                    16.3639(14) 
_cell_length_b                    10.9494(5) 
_cell_length_c                    26.470(2) 
_cell_angle_alpha                 90.00 
_cell_angle_beta                  94.578(10) 
_cell_angle_gamma                 90.00 
_cell_volume                      4727.7(6) 
_cell_formula_units_Z             4 
_cell_measurement_temperature     150(2) 
_cell_measurement_reflns_used     5000 
_cell_measurement_theta_min       1.5
_cell_measurement_theta_max       26 
 
_exptl_crystal_description        needle
_exptl_crystal_colour             colorless 
_exptl_crystal_size_max           0.5 
_exptl_crystal_size_mid           0.2
_exptl_crystal_size_min           0.2 
_exptl_crystal_density_meas       ? 
_exptl_crystal_density_diffrn     2.236 
_exptl_crystal_density_method     'not measured' 
_exptl_crystal_F_000              3064 
_exptl_absorpt_coefficient_mu     1.244 
_exptl_absorpt_correction_type    numerical
_exptl_absorpt_correction_T_min   0.5388
_exptl_absorpt_correction_T_max   0.6892 
_exptl_absorpt_process_details    numerical 
 
_exptl_special_details 
; 
 Crystal mounted in PFE oil 
; 
 
_diffrn_ambient_temperature       150(2) 
_diffrn_radiation_wavelength      0.71073 
_diffrn_radiation_type            MoK\a 
_diffrn_radiation_source          'fine-focus sealed tube' 
_diffrn_radiation_monochromator   graphite 
_diffrn_measurement_device_type   STOE IPDS 
_diffrn_measurement_method        Image Plate Technique 
_diffrn_detector_area_resol_mean  - 
_diffrn_standards_number          - 
_diffrn_standards_interval_count  - 
_diffrn_standards_interval_time   - 
_diffrn_standards_decay_%         - 
_diffrn_reflns_number             14790 
_diffrn_reflns_av_R_equivalents   0.0262 
_diffrn_reflns_av_sigmaI/netI     0.0242 
_diffrn_reflns_limit_h_min        -13 
_diffrn_reflns_limit_h_max        20 
_diffrn_reflns_limit_k_min        -13 
_diffrn_reflns_limit_k_max        12 
_diffrn_reflns_limit_l_min        -32 
_diffrn_reflns_limit_l_max        30 
_diffrn_reflns_theta_min          2.01 
_diffrn_reflns_theta_max          25.93 
_reflns_number_total              7135 
_reflns_number_gt                 6002 
_reflns_threshold_expression      >2sigma(I) 
 
_computing_data_collection        EXPOSE 
_computing_cell_refinement        CELL 
_computing_data_reduction         INTEGRATE 
_computing_structure_solution     'SHELXS-97 (Sheldrick, 1990)' 
_computing_structure_refinement   'SHELXL-97 (Sheldrick, 1997)' 
_computing_molecular_graphics     RESVIEW and XP 
_computing_publication_material   SHELXL 
 
_refine_special_details 
; 
 Refinement of F^2^ against ALL reflections.  The weighted R-factor wR and 
 goodness of fit S are based on F^2^, conventional R-factors R are based 
 on F, with F set to zero for negative F^2^. The threshold expression of 
 F^2^ > 2sigma(F^2^) is used only for calculating R-factors(gt) etc. and is 
 not relevant to the choice of reflections for refinement.  R-factors based 
 on F^2^ are statistically about twice as large as those based on F, and R- 
 factors based on ALL data will be even larger. 
; 
 
_refine_ls_structure_factor_coef  Fsqd  
_refine_ls_matrix_type            full 
_refine_ls_weighting_scheme       calc  
_refine_ls_weighting_details 
 'calc w=1/[\s^2^(Fo^2^)+(0.0666P)^2^+10.2209P] where P=(Fo^2^+2Fc^2^)/3' 
_atom_sites_solution_primary      direct 
_atom_sites_solution_secondary    difmap 
_atom_sites_solution_hydrogens    geom 
_refine_ls_hydrogen_treatment     mixed 
_refine_ls_extinction_method      SHELXL 
_refine_ls_extinction_coef        0.0002(2) 
_refine_ls_extinction_expression 
 'Fc^*^=kFc[1+0.001xFc^2^\l^3^/sin(2\q)]^-1/4^' 
_refine_ls_number_reflns          7135 
_refine_ls_number_parameters      742 
_refine_ls_number_restraints      0 
_refine_ls_R_factor_all           0.0518 
_refine_ls_R_factor_gt            0.0435 
_refine_ls_wR_factor_ref          0.1175 
_refine_ls_wR_factor_gt           0.1130 
_refine_ls_goodness_of_fit_ref    1.058 
_refine_ls_restrained_S_all       1.058 
_refine_ls_shift/su_max           1.497 
_refine_ls_shift/su_mean          0.007 
 
loop_ 
 _atom_site_label 
 _atom_site_type_symbol 
 _atom_site_fract_x 
 _atom_site_fract_y 
 _atom_site_fract_z 
 _atom_site_U_iso_or_equiv 
 _atom_site_adp_type 
 _atom_site_occupancy 
 _atom_site_symmetry_multiplicity 
 _atom_site_calc_flag 
 _atom_site_refinement_flags 
 _atom_site_disorder_assembly 
 _atom_site_disorder_group 
Ag1 Ag -0.00256(2) 0.76782(3) -0.484301(11) 0.02695(9) Uani 1 1 d . . . 
S2 S 0.04630(8) 0.91141(10) -0.35573(4) 0.0323(3) Uani 1 1 d . . . 
S3 S 0.04270(7) 1.20034(9) -0.37519(4) 0.0295(2) Uani 1 1 d . . . 
P1 P 0.02417(8) 1.07425(10) -0.31634(4) 0.0307(3) Uani 1 1 d . . . 
P5 P -0.10042(7) 0.59916(9) -0.51151(4) 0.0246(2) Uani 1 1 d . . . 
P6 P -0.09845(8) 0.49853(10) -0.58463(4) 0.0287(3) Uani 1 1 d . . . 
Al1 Al -0.00355(7) 0.56817(10) -0.18445(4) 0.0186(2) Uani 1 1 d . . . 
S6 S 0.13380(7) 0.67782(9) -0.43719(4) 0.0281(2) Uani 1 1 d . . . 
S5 S -0.12972(8) 0.47152(10) -0.45769(4) 0.0333(3) Uani 1 1 d . . . 
P3 P -0.03262(7) 0.93063(9) -0.42031(4) 0.0238(2) Uani 1 1 d . . . 
P9 P 0.03410(7) 0.86929(9) -0.56578(4) 0.0257(2) Uani 1 1 d . . . 
P2 P -0.13882(8) 1.04248(11) -0.39767(5) 0.0338(3) Uani 1 1 d . . . 
P4 P -0.20855(8) 0.61062(10) -0.56740(5) 0.0355(3) Uani 1 1 d . . . 
S4 S -0.28832(8) 0.48406(11) -0.53857(6) 0.0462(3) Uani 1 1 d . . . 
S1 S -0.10487(9) 1.07310(11) -0.32128(4) 0.0392(3) Uani 1 1 d . . . 
P7 P 0.20921(8) 0.64438(11) -0.49790(5) 0.0366(3) Uani 1 1 d . . . 
S8 S -0.18129(10) 0.98351(14) -0.53422(5) 0.0527(4) Uani 1 1 d . . . 
S7 S -0.2594(2) 0.8031(3) -0.46396(12) 0.0559(8) Uani 0.750(7) 1 d P A 1 
C100 C -0.2326(7) 0.9034(8) -0.5034(3) 0.058(2) Uani 0.750(7) 1 d P A 1 
S7A S -0.2829(6) 0.8302(9) -0.4746(4) 0.053(2) Uani 0.250(7) 1 d P A 2 
C10A C -0.2774(12) 0.9126(18) -0.5117(8) 0.033(5) Uani 0.250(7) 1 d P A 2 
F6 F 0.1661(2) 0.8661(3) -0.25080(13) 0.0559(9) Uani 1 1 d . . . 
F2 F 0.1041(2) 0.6569(3) -0.30583(10) 0.0530(9) Uani 1 1 d . . . 
F5 F 0.1357(3) 0.8472(3) -0.17346(12) 0.0576(10) Uani 1 1 d . . . 
O4 O -0.0727(2) 0.5958(3) -0.23519(13) 0.0434(10) Uani 1 1 d . B . 
F15 F 0.0954(2) 0.4570(3) -0.08590(12) 0.0553(9) Uani 1 1 d . . . 
O1 O 0.0957(2) 0.5891(3) -0.20043(12) 0.0347(8) Uani 1 1 d . . . 
F1 F 0.1703(3) 0.5007(3) -0.27674(11) 0.0620(11) Uani 1 1 d . . . 
F21 F 0.0280(3) 0.9029(3) -0.09241(16) 0.0657(11) Uani 1 1 d . . . 
F12 F -0.0286(4) 0.1680(3) -0.20039(13) 0.0819(16) Uani 1 1 d . . . 
O2 O -0.0112(2) 0.4183(3) -0.16500(12) 0.0342(8) Uani 1 1 d . . . 
F27 F -0.1379(2) 0.5491(3) -0.09968(14) 0.0572(9) Uani 1 1 d . . . 
F11 F 0.0804(3) 0.2789(3) -0.22127(12) 0.0650(11) Uani 1 1 d . . . 
F4 F 0.04605(19) 0.8084(2) -0.23487(11) 0.0417(7) Uani 1 1 d . . . 
F24 F -0.1508(3) 0.8994(4) -0.09874(18) 0.0789(14) Uani 1 1 d . . . 
F16 F -0.0321(3) 0.3314(3) -0.06318(11) 0.0652(12) Uani 1 1 d . . . 
F13 F 0.1230(3) 0.2686(3) -0.07338(14) 0.0840(15) Uani 1 1 d . . . 
F23 F -0.1875(3) 0.7524(4) -0.1490(2) 0.0869(16) Uani 1 1 d . . . 
F20 F -0.0300(4) 0.8433(4) -0.02657(13) 0.0880(17) Uani 1 1 d . . . 
C5 C 0.0241(3) 0.3187(4) -0.14270(16) 0.0319(11) Uani 1 1 d . . . 
C1 C 0.1517(3) 0.6616(4) -0.21868(14) 0.0233(9) Uani 1 1 d . . . 
F10 F 0.1008(3) 0.1412(3) -0.16357(15) 0.0727(13) Uani 1 1 d . . . 
F26 F -0.0481(3) 0.5813(3) -0.03751(12) 0.0613(11) Uani 1 1 d . . . 
O3 O -0.0151(3) 0.6717(3) -0.13736(12) 0.0462(10) Uani 1 1 d . . . 
F19 F 0.0665(3) 0.7410(4) -0.05271(18) 0.0781(14) Uani 1 1 d . . . 
F25 F -0.1605(4) 0.6837(4) -0.04380(17) 0.0861(15) Uani 1 1 d . . . 
F22 F -0.0933(3) 0.8752(4) -0.16699(14) 0.0748(13) Uani 1 1 d . . . 
C13 C -0.1283(3) 0.5568(4) -0.27169(16) 0.0285(10) Uani 1 1 d . . . 
C3 C 0.1259(3) 0.7986(4) -0.21977(17) 0.0344(11) Uani 1 1 d . . . 
C12 C -0.1011(4) 0.6351(5) -0.07012(19) 0.0443(13) Uani 1 1 d . . . 
C9 C -0.0593(3) 0.7296(4) -0.10336(15) 0.0276(10) Uani 1 1 d . . . 
C11 C -0.1241(4) 0.8165(5) -0.1291(2) 0.0551(17) Uani 1 1 d . . . 
C10 C 0.0036(4) 0.8037(5) -0.0691(2) 0.0573(18) Uani 1 1 d . . . 
C7 C 0.1051(7) 0.3543(6) -0.1087(3) 0.109(4) Uani 1 1 d . . . 
C6 C 0.0482(6) 0.2266(7) -0.1809(2) 0.072(2) Uani 1 1 d . . . 
F7 F 0.2199(2) 0.6526(3) -0.13628(10) 0.0509(9) Uani 1 1 d . . . 
F31 F -0.1338(3) 0.7631(3) -0.29761(14) 0.0656(12) Uani 1 1 d . . . 
F8 F 0.2693(2) 0.5422(3) -0.19218(13) 0.0512(9) Uani 1 1 d . . . 
F9 F 0.2866(2) 0.7378(3) -0.19273(16) 0.0656(11) Uani 1 1 d . . . 
F17 F -0.1120(3) 0.2600(3) -0.13062(15) 0.0653(11) Uani 1 1 d . . . 
F28 F -0.1389(3) 0.4116(3) -0.33986(11) 0.0711(13) Uani 1 1 d . . . 
F34 F -0.2035(3) 0.4883(4) -0.20397(12) 0.0635(11) Uani 1 1 d . . . 
F32 F -0.2067(3) 0.6391(4) -0.34439(16) 0.0894(15) Uani 1 1 d . . . 
F29 F -0.0223(3) 0.4300(4) -0.29675(19) 0.0776(13) Uani 1 1 d . . . 
F33 F -0.0695(4) 0.6385(6) -0.34550(16) 0.0894(16) Uani 1 1 d . . . 
F14 F 0.1687(3) 0.3627(4) -0.1429(2) 0.0898(16) Uani 1 1 d . . . 
F3 F 0.2357(3) 0.6654(5) -0.28987(14) 0.0804(13) Uani 1 1 d . . . 
F18 F -0.0173(4) 0.1465(3) -0.0950(2) 0.0965(17) Uani 1 1 d . . . 
C4 C 0.2332(3) 0.6481(4) -0.18463(18) 0.0359(11) Uani 1 1 d . . . 
C2 C 0.1674(4) 0.6197(5) -0.27317(17) 0.0432(13) Uani 1 1 d . . . 
F36 F -0.2626(3) 0.4699(6) -0.27825(18) 0.1059(19) Uani 1 1 d . . . 
C8 C -0.0362(6) 0.2631(6) -0.1058(2) 0.065(2) Uani 1 1 d . . . 
C14 C -0.1011(6) 0.4392(8) -0.2974(3) 0.057(2) Uani 0.809(5) 1 d P B 1 
C15 C -0.1348(5) 0.6570(6) -0.3161(3) 0.053(2) Uani 0.809(5) 1 d P B 1 
C16 C -0.2109(6) 0.5467(9) -0.2510(3) 0.061(2) Uani 0.809(5) 1 d P B 1 
F35 F -0.2450(3) 0.6658(5) -0.2486(2) 0.0712(15) Uani 0.809(5) 1 d P B 1 
F30 F -0.1214(4) 0.3430(4) -0.2629(2) 0.0664(16) Uani 0.809(5) 1 d P B 1 
C14A C -0.0754(15) 0.487(2) -0.3151(9) 0.085(8) Uani 0.191(5) 1 d P B 2 
C16A C -0.1857(11) 0.4497(14) -0.2441(6) 0.010(4) Uani 0.191(5) 1 d P B 2 
C15A C -0.1883(11) 0.6584(17) -0.2859(7) 0.019(4) Uani 0.191(5) 1 d P B 2 
F30A F -0.0556(17) 0.549(2) -0.3348(9) 0.075(8) Uani 0.191(5) 1 d P B 2 
F35A F -0.1496(11) 0.3443(13) -0.2368(5) 0.033(4) Uani 0.191(5) 1 d P B 2 
 
loop_ 
 _atom_site_aniso_label 
 _atom_site_aniso_U_11 
 _atom_site_aniso_U_22 
 _atom_site_aniso_U_33 
 _atom_site_aniso_U_23 
 _atom_site_aniso_U_13 
 _atom_site_aniso_U_12 
Ag1 0.03403(19) 0.02007(15) 0.02593(14) -0.00181(10) -0.00276(13) -0.00258(12) 
S2 0.0417(7) 0.0285(5) 0.0253(4) 0.0021(4) -0.0052(5) 0.0083(4) 
S3 0.0324(6) 0.0260(5) 0.0300(4) -0.0039(4) 0.0010(5) -0.0075(4) 
P1 0.0389(7) 0.0325(6) 0.0202(4) -0.0033(4) -0.0006(5) -0.0009(5) 
P5 0.0266(6) 0.0221(5) 0.0247(4) -0.0024(3) -0.0005(4) -0.0042(4) 
P6 0.0391(7) 0.0261(5) 0.0207(4) -0.0006(4) 0.0016(5) -0.0037(4) 
Al1 0.0179(6) 0.0182(5) 0.0197(5) -0.0007(4) 0.0026(5) 0.0005(4) 
S6 0.0310(6) 0.0201(5) 0.0320(4) -0.0029(3) -0.0052(5) -0.0005(4) 
S5 0.0411(7) 0.0362(6) 0.0230(4) 0.0025(4) 0.0061(5) -0.0009(5) 
P3 0.0273(6) 0.0203(5) 0.0234(4) -0.0011(3) -0.0006(4) -0.0001(4) 
P9 0.0311(6) 0.0203(5) 0.0250(4) 0.0014(3) -0.0021(5) 0.0005(4) 
P2 0.0220(6) 0.0360(6) 0.0435(6) -0.0090(5) 0.0028(5) -0.0013(4) 
P4 0.0380(7) 0.0223(5) 0.0436(6) 0.0013(4) -0.0135(6) 0.0036(4) 
S4 0.0220(6) 0.0343(6) 0.0808(9) -0.0054(6) -0.0048(7) -0.0005(4) 
S1 0.0408(8) 0.0424(6) 0.0367(5) -0.0085(4) 0.0176(6) -0.0055(5) 
P7 0.0327(7) 0.0273(6) 0.0504(6) 0.0058(5) 0.0074(6) -0.0077(5) 
S8 0.0468(8) 0.0593(8) 0.0507(7) -0.0094(6) -0.0050(7) -0.0036(6) 
S7 0.060(2) 0.0509(14) 0.0582(13) -0.0110(10) 0.0110(13) -0.0127(12) 
C100 0.050(6) 0.060(5) 0.064(5) -0.032(4) 0.008(5) -0.012(4) 
S7A 0.037(4) 0.055(5) 0.068(5) -0.018(4) 0.017(4) -0.013(3) 
C10A 0.000(7) 0.045(11) 0.052(11) -0.004(8) -0.004(9) 0.010(7) 
F6 0.050(2) 0.0481(17) 0.0682(18) 0.0271(14) -0.0049(18) -0.0191(15) 
F2 0.074(2) 0.0559(18) 0.0269(12) 0.0006(12) -0.0118(15) 0.0082(16) 
F5 0.083(3) 0.0371(16) 0.0493(16) -0.0134(12) -0.0137(18) 0.0101(16) 
O4 0.0388(19) 0.0314(17) 0.0549(19) 0.0050(14) -0.0278(18) -0.0064(14) 
F15 0.063(2) 0.0484(17) 0.0513(16) -0.0092(13) -0.0160(17) 0.0098(15) 
O1 0.0220(17) 0.0381(17) 0.0446(16) 0.0152(13) 0.0067(15) 0.0016(13) 
F1 0.086(3) 0.055(2) 0.0428(15) -0.0175(13) -0.0076(18) 0.0251(18) 
F21 0.066(3) 0.0422(18) 0.088(2) -0.0045(16) -0.004(2) -0.0113(16) 
F12 0.148(5) 0.0422(19) 0.0540(18) -0.0178(15) 0.000(3) -0.016(2) 
O2 0.0340(19) 0.0212(15) 0.0465(16) 0.0083(12) -0.0012(16) 0.0008(12) 
F27 0.048(2) 0.0538(19) 0.072(2) -0.0028(15) 0.014(2) -0.0146(16) 
F11 0.085(3) 0.068(2) 0.0470(16) -0.0132(15) 0.0322(19) -0.003(2) 
F4 0.0328(16) 0.0378(15) 0.0539(15) 0.0092(12) -0.0009(15) 0.0087(12) 
F24 0.074(3) 0.057(2) 0.107(3) 0.002(2) 0.015(3) 0.038(2) 
F16 0.106(4) 0.060(2) 0.0325(13) -0.0026(13) 0.0202(18) 0.010(2) 
F13 0.128(4) 0.057(2) 0.062(2) 0.0196(16) -0.023(3) 0.035(2) 
F23 0.049(2) 0.081(3) 0.124(3) 0.014(2) -0.040(3) 0.0060(19) 
F20 0.145(5) 0.073(2) 0.0432(17) -0.0284(17) -0.013(2) 0.001(3) 
C5 0.043(3) 0.019(2) 0.034(2) 0.0049(15) 0.010(2) 0.0058(17) 
C1 0.017(2) 0.030(2) 0.0232(16) 0.0019(14) 0.0016(16) -0.0016(15) 
F10 0.092(3) 0.0452(19) 0.083(2) -0.0093(16) 0.018(2) 0.0337(19) 
F26 0.088(3) 0.0524(19) 0.0434(15) 0.0150(13) 0.0021(19) 0.0151(18) 
O3 0.068(3) 0.0357(18) 0.0377(16) -0.0081(13) 0.0197(18) 0.0030(17) 
F19 0.050(2) 0.070(2) 0.109(3) 0.006(2) -0.031(3) 0.0072(18) 
F25 0.097(4) 0.072(3) 0.100(3) 0.007(2) 0.071(3) 0.024(3) 
F22 0.090(3) 0.069(2) 0.063(2) 0.0330(17) -0.010(2) 0.013(2) 
C13 0.023(2) 0.031(2) 0.0308(19) -0.0071(16) -0.0028(19) -0.0022(17) 
C3 0.037(3) 0.031(2) 0.034(2) 0.0040(17) -0.003(2) -0.0026(19) 
C12 0.047(3) 0.046(3) 0.042(2) -0.003(2) 0.019(3) 0.014(2) 
C9 0.033(2) 0.025(2) 0.0255(17) -0.0071(14) 0.0033(18) 0.0118(17) 
C11 0.052(4) 0.044(3) 0.066(3) 0.000(3) -0.014(3) 0.019(3) 
C10 0.071(4) 0.036(3) 0.060(3) 0.001(2) -0.029(3) -0.002(3) 
C7 0.180(8) 0.031(3) 0.101(5) -0.002(3) -0.094(6) 0.022(4) 
C6 0.101(7) 0.071(4) 0.047(3) 0.005(3) 0.028(4) 0.031(4) 
F7 0.069(2) 0.0503(17) 0.0299(12) -0.0010(11) -0.0192(15) 0.0050(15) 
F31 0.083(3) 0.0409(18) 0.069(2) 0.0118(14) -0.018(2) 0.0099(17) 
F8 0.0315(17) 0.0572(18) 0.0630(18) -0.0003(14) -0.0069(16) 0.0178(14) 
F9 0.0311(17) 0.069(2) 0.093(2) 0.0206(18) -0.022(2) -0.0199(15) 
F17 0.062(3) 0.058(2) 0.078(2) 0.0038(17) 0.020(2) -0.0263(18) 
F28 0.118(4) 0.063(2) 0.0327(14) -0.0191(14) 0.0049(19) -0.004(2) 
F34 0.057(3) 0.086(3) 0.0500(17) 0.0035(17) 0.0238(19) -0.006(2) 
F32 0.088(3) 0.092(3) 0.077(2) -0.004(2) -0.055(3) 0.017(2) 
F29 0.063(3) 0.070(3) 0.103(3) -0.006(2) 0.029(3) 0.023(2) 
F33 0.069(4) 0.138(4) 0.066(2) -0.006(3) 0.037(3) -0.032(3) 
F14 0.032(2) 0.094(3) 0.149(4) 0.053(3) 0.039(3) 0.018(2) 
F3 0.068(3) 0.124(4) 0.0546(19) 0.009(2) 0.038(2) 0.007(3) 
F18 0.116(5) 0.042(2) 0.140(4) 0.044(2) 0.062(4) 0.007(2) 
C4 0.024(2) 0.044(3) 0.039(2) 0.0011(18) -0.003(2) -0.0044(19) 
C2 0.049(4) 0.055(3) 0.026(2) 0.0011(19) 0.005(2) 0.006(3) 
F36 0.044(2) 0.195(5) 0.078(3) -0.018(3) -0.003(3) -0.057(3) 
C8 0.092(7) 0.053(4) 0.054(3) 0.002(3) 0.030(4) -0.001(4) 
C14 0.061(5) 0.063(5) 0.046(4) -0.021(3) -0.003(4) 0.016(4) 
C15 0.052(5) 0.047(4) 0.057(4) 0.008(3) -0.018(4) -0.007(3) 
C16 0.045(5) 0.097(6) 0.043(3) -0.005(4) 0.017(4) -0.006(5) 
F35 0.046(3) 0.089(3) 0.080(3) -0.020(2) 0.015(3) 0.033(2) 
F30 0.099(5) 0.030(2) 0.068(3) 0.0006(19) -0.005(3) -0.015(2) 
C14A 0.067(14) 0.103(12) 0.073(11) 0.119(10) -0.063(10) -0.096(11) 
C16A 0.008(8) 0.004(8) 0.019(8) -0.004(5) -0.004(7) 0.004(6) 
C15A 0.000(8) 0.029(10) 0.025(8) 0.016(7) -0.012(8) -0.002(7) 
F30A 0.084(18) 0.068(14) 0.070(12) 0.017(11) -0.004(13) 0.023(12) 
F35A 0.038(9) 0.046(8) 0.017(6) -0.005(5) 0.015(6) -0.032(7) 
 
_geom_special_details 
; 
 All esds (except the esd in the dihedral angle between two l.s. planes) 
 are estimated using the full covariance matrix.  The cell esds are taken 
 into account individually in the estimation of esds in distances, angles 
 and torsion angles; correlations between esds in cell parameters are only 
 used when they are defined by crystal symmetry.  An approximate (isotropic) 
 treatment of cell esds is used for estimating esds involving l.s. planes. 
; 
 
loop_ 
 _geom_bond_atom_site_label_1 
 _geom_bond_atom_site_label_2 
 _geom_bond_distance 
 _geom_bond_site_symmetry_2 
 _geom_bond_publ_flag 
Ag1 P5 2.5118(10) . ? 
Ag1 P3 2.5342(11) . ? 
Ag1 P9 2.5403(11) . ? 
Ag1 S6 2.6573(10) . ? 
S2 P3 2.0691(13) . ? 
S2 P1 2.1114(16) . ? 
S3 P9 2.0709(13) 3_574 ? 
S3 P1 2.1213(16) . ? 
P1 S1 2.105(2) . ? 
P5 S5 2.0790(15) . ? 
P5 P4 2.2175(14) . ? 
P5 P6 2.2296(14) . ? 
P6 S6 2.1095(15) 3_564 ? 
P6 P4 2.2565(18) . ? 
Al1 O3 1.706(3) . ? 
Al1 O4 1.712(3) . ? 
Al1 O1 1.725(4) . ? 
Al1 O2 1.727(3) . ? 
S6 P6 2.1095(15) 3_564 ? 
S6 P7 2.1343(19) . ? 
S5 P7 2.1072(16) 3_564 ? 
P3 P9 2.2213(14) 3_574 ? 
P3 P2 2.2462(17) . ? 
P9 S3 2.0709(13) 3_574 ? 
P9 P3 2.2213(14) 3_574 ? 
P9 P2 2.2517(19) 3_574 ? 
P2 S1 2.0811(16) . ? 
P2 P9 2.2517(18) 3_574 ? 
P4 S4 2.089(2) . ? 
S4 P7 2.0942(17) 3_564 ? 
P7 S4 2.0942(17) 3_564 ? 
P7 S5 2.1072(16) 3_564 ? 
S8 C100 1.500(11) . ? 
S8 C10A 1.89(2) . ? 
S7 C100 1.600(11) . ? 
S7A C10A 1.34(2) . ? 
F6 C3 1.319(6) . ? 
F2 C2 1.358(6) . ? 
F5 C3 1.334(5) . ? 
O4 C13 1.343(5) . ? 
F15 C7 1.292(8) . ? 
O1 C1 1.332(5) . ? 
F1 C2 1.307(6) . ? 
F21 C10 1.327(7) . ? 
F12 C6 1.467(11) . ? 
O2 C5 1.349(5) . ? 
F27 C12 1.336(6) . ? 
F11 C6 1.354(9) . ? 
F4 C3 1.340(6) . ? 
F24 C11 1.309(8) . ? 
F16 C8 1.352(7) . ? 
F13 C7 1.341(7) . ? 
F23 C11 1.326(7) . ? 
F20 C10 1.362(9) . ? 
C5 C6 1.504(8) . ? 
C5 C8 1.566(10) . ? 
C5 C7 1.589(9) . ? 
C1 C2 1.554(6) . ? 
C1 C4 1.557(5) . ? 
C1 C3 1.558(6) . ? 
F10 C6 1.328(8) . ? 
F26 C12 1.314(6) . ? 
O3 C9 1.356(6) . ? 
F19 C10 1.285(7) . ? 
F25 C12 1.350(8) . ? 
F22 C11 1.325(9) . ? 
C13 C16 1.503(11) . ? 
C13 C15A 1.512(17) . ? 
C13 C14 1.539(8) . ? 
C13 C15 1.604(8) . ? 
C13 C14A 1.68(3) . ? 
C13 C16A 1.703(19) . ? 
C12 C9 1.552(8) . ? 
C9 C11 1.542(6) . ? 
C9 C10 1.546(6) . ? 
C7 F14 1.434(13) . ? 
F7 C4 1.317(6) . ? 
F31 C15 1.261(8) . ? 
F31 C15A 1.500(19) . ? 
F8 C4 1.324(6) . ? 
F9 C4 1.342(6) . ? 
F17 C8 1.356(10) . ? 
F28 C14 1.276(7) . ? 
F28 C14A 1.443(19) . ? 
F34 C16A 1.202(18) . ? 
F34 C16 1.395(9) . ? 
F32 C15 1.358(7) . ? 
F32 C15A 1.568(19) . ? 
F29 C14A 1.14(2) . ? 
F29 C14 1.291(11) . ? 
F29 F30A 1.71(2) . ? 
F33 F30A 1.04(2) . ? 
F33 C15 1.387(11) . ? 
F33 C14A 1.851(17) . ? 
F3 C2 1.333(8) . ? 
F18 C8 1.339(8) . ? 
F36 C16 1.359(10) . ? 
F36 C16A 1.505(15) . ? 
C14 F30 1.449(11) . ? 
C16 F35 1.422(11) . ? 
C14A F30A 0.93(3) . ? 
C16A F35A 1.31(2) . ? 
 
loop_ 
 _geom_angle_atom_site_label_1 
 _geom_angle_atom_site_label_2 
 _geom_angle_atom_site_label_3 
 _geom_angle 
 _geom_angle_site_symmetry_1 
 _geom_angle_site_symmetry_3 
 _geom_angle_publ_flag 
P5 Ag1 P3 123.75(4) . . ? 
P5 Ag1 P9 105.45(3) . . ? 
P3 Ag1 P9 109.36(3) . . ? 
P5 Ag1 S6 110.74(3) . . ? 
P3 Ag1 S6 98.49(3) . . ? 
P9 Ag1 S6 108.32(4) . . ? 
P3 S2 P1 101.64(6) . . ? 
P9 S3 P1 101.58(6) 3_574 . ? 
S1 P1 S2 100.08(7) . . ? 
S1 P1 S3 99.19(6) . . ? 
S2 P1 S3 98.43(6) . . ? 
S5 P5 P4 106.24(7) . . ? 
S5 P5 P6 106.43(6) . . ? 
P4 P5 P6 60.98(5) . . ? 
S5 P5 Ag1 118.32(5) . . ? 
P4 P5 Ag1 127.32(5) . . ? 
P6 P5 Ag1 124.00(6) . . ? 
S6 P6 P5 101.03(6) 3_564 . ? 
S6 P6 P4 101.63(7) 3_564 . ? 
P5 P6 P4 59.24(5) . . ? 
O3 Al1 O4 110.54(19) . . ? 
O3 Al1 O1 104.6(2) . . ? 
O4 Al1 O1 111.08(18) . . ? 
O3 Al1 O2 113.47(18) . . ? 
O4 Al1 O2 110.03(15) . . ? 
O1 Al1 O2 106.95(17) . . ? 
P6 S6 P7 103.70(6) 3_564 . ? 
P6 S6 Ag1 103.27(5) 3_564 . ? 
P7 S6 Ag1 102.98(5) . . ? 
P5 S5 P7 100.86(6) . 3_564 ? 
S2 P3 P9 103.59(5) . 3_574 ? 
S2 P3 P2 106.27(6) . . ? 
P9 P3 P2 60.53(5) 3_574 . ? 
S2 P3 Ag1 109.82(5) . . ? 
P9 P3 Ag1 125.67(5) 3_574 . ? 
P2 P3 Ag1 139.24(5) . . ? 
S3 P9 P3 103.89(5) 3_574 3_574 ? 
S3 P9 P2 105.70(6) 3_574 3_574 ? 
P3 P9 P2 60.28(5) 3_574 3_574 ? 
S3 P9 Ag1 108.02(6) 3_574 . ? 
P3 P9 Ag1 124.88(5) 3_574 . ? 
P2 P9 Ag1 142.36(5) 3_574 . ? 
S1 P2 P3 101.23(6) . . ? 
S1 P2 P9 101.25(6) . 3_574 ? 
P3 P2 P9 59.19(5) . 3_574 ? 
S4 P4 P5 101.97(6) . . ? 
S4 P4 P6 104.20(6) . . ? 
P5 P4 P6 59.77(5) . . ? 
P4 S4 P7 103.44(7) . 3_564 ? 
P2 S1 P1 104.48(7) . . ? 
S4 P7 S5 100.61(7) 3_564 3_564 ? 
S4 P7 S6 98.13(7) 3_564 . ? 
S5 P7 S6 98.93(7) 3_564 . ? 
C100 S8 C10A 22.1(6) . . ? 
S8 C100 S7 161.9(8) . . ? 
S7A C10A S8 127.8(11) . . ? 
C13 O4 Al1 151.1(3) . . ? 
C1 O1 Al1 148.9(3) . . ? 
C5 O2 Al1 149.3(3) . . ? 
O2 C5 C6 112.0(4) . . ? 
O2 C5 C8 108.5(5) . . ? 
C6 C5 C8 111.8(5) . . ? 
O2 C5 C7 111.0(4) . . ? 
C6 C5 C7 107.1(6) . . ? 
C8 C5 C7 106.4(6) . . ? 
O1 C1 C2 109.3(4) . . ? 
O1 C1 C4 108.4(3) . . ? 
C2 C1 C4 108.2(4) . . ? 
O1 C1 C3 112.8(4) . . ? 
C2 C1 C3 109.4(3) . . ? 
C4 C1 C3 108.7(3) . . ? 
C9 O3 Al1 153.1(4) . . ? 
O4 C13 C16 109.8(4) . . ? 
O4 C13 C15A 109.5(7) . . ? 
C16 C13 C15A 63.8(9) . . ? 
O4 C13 C14 112.4(4) . . ? 
C16 C13 C14 113.6(6) . . ? 
C15A C13 C14 135.3(8) . . ? 
O4 C13 C15 108.1(4) . . ? 
C16 C13 C15 107.9(5) . . ? 
C15A C13 C15 46.4(8) . . ? 
C14 C13 C15 104.7(5) . . ? 
O4 C13 C14A 106.3(7) . . ? 
C16 C13 C14A 138.1(7) . . ? 
C15A C13 C14A 121.7(10) . . ? 
C14 C13 C14A 29.8(6) . . ? 
C15 C13 C14A 79.5(7) . . ? 
O4 C13 C16A 106.1(6) . . ? 
C16 C13 C16A 41.4(7) . . ? 
C15A C13 C16A 104.0(10) . . ? 
C14 C13 C16A 78.6(7) . . ? 
C15 C13 C16A 141.0(6) . . ? 
C14A C13 C16A 108.2(8) . . ? 
F6 C3 F5 108.7(4) . . ? 
F6 C3 F4 107.0(3) . . ? 
F5 C3 F4 106.5(5) . . ? 
F6 C3 C1 113.8(5) . . ? 
F5 C3 C1 110.8(3) . . ? 
F4 C3 C1 109.8(4) . . ? 
F26 C12 F27 108.2(4) . . ? 
F26 C12 F25 107.6(4) . . ? 
F27 C12 F25 105.7(6) . . ? 
F26 C12 C9 111.9(5) . . ? 
F27 C12 C9 109.7(4) . . ? 
F25 C12 C9 113.4(4) . . ? 
O3 C9 C11 112.3(4) . . ? 
O3 C9 C10 105.7(5) . . ? 
C11 C9 C10 109.7(4) . . ? 
O3 C9 C12 110.3(4) . . ? 
C11 C9 C12 110.0(5) . . ? 
C10 C9 C12 108.7(4) . . ? 
F24 C11 F22 107.0(5) . . ? 
F24 C11 F23 108.7(6) . . ? 
F22 C11 F23 106.7(5) . . ? 
F24 C11 C9 114.1(4) . . ? 
F22 C11 C9 110.2(6) . . ? 
F23 C11 C9 109.7(4) . . ? 
F19 C10 F21 109.3(6) . . ? 
F19 C10 F20 104.9(5) . . ? 
F21 C10 F20 106.3(5) . . ? 
F19 C10 C9 113.3(5) . . ? 
F21 C10 C9 111.6(4) . . ? 
F20 C10 C9 111.0(6) . . ? 
F15 C7 F13 108.1(6) . . ? 
F15 C7 F14 111.2(7) . . ? 
F13 C7 F14 110.8(7) . . ? 
F15 C7 C5 110.5(6) . . ? 
F13 C7 C5 110.4(7) . . ? 
F14 C7 C5 105.9(6) . . ? 
F10 C6 F11 106.8(7) . . ? 
F10 C6 F12 109.1(6) . . ? 
F11 C6 F12 106.5(5) . . ? 
F10 C6 C5 115.9(5) . . ? 
F11 C6 C5 112.7(6) . . ? 
F12 C6 C5 105.4(7) . . ? 
C15 F31 C15A 52.1(9) . . ? 
C14 F28 C14A 35.2(8) . . ? 
C16A F34 C16 51.8(8) . . ? 
C15 F32 C15A 49.2(8) . . ? 
C14A F29 C14 39.6(10) . . ? 
C14A F29 F30A 30.7(14) . . ? 
C14 F29 F30A 70.3(11) . . ? 
F30A F33 C15 98.4(17) . . ? 
F30A F33 C14A 19(2) . . ? 
C15 F33 C14A 79.5(11) . . ? 
F7 C4 F8 106.9(4) . . ? 
F7 C4 F9 106.8(4) . . ? 
F8 C4 F9 108.3(5) . . ? 
F7 C4 C1 111.0(4) . . ? 
F8 C4 C1 111.6(3) . . ? 
F9 C4 C1 112.1(4) . . ? 
F1 C2 F3 108.2(5) . . ? 
F1 C2 F2 106.5(4) . . ? 
F3 C2 F2 107.1(4) . . ? 
F1 C2 C1 111.8(4) . . ? 
F3 C2 C1 113.7(4) . . ? 
F2 C2 C1 109.2(4) . . ? 
C16 F36 C16A 46.9(7) . . ? 
F18 C8 F16 110.7(5) . . ? 
F18 C8 F17 105.5(6) . . ? 
F16 C8 F17 113.6(7) . . ? 
F18 C8 C5 110.9(7) . . ? 
F16 C8 C5 108.3(6) . . ? 
F17 C8 C5 107.8(5) . . ? 
F28 C14 F29 114.0(7) . . ? 
F28 C14 F30 105.2(6) . . ? 
F29 C14 F30 102.4(6) . . ? 
F28 C14 C13 116.8(6) . . ? 
F29 C14 C13 112.6(6) . . ? 
F30 C14 C13 103.9(6) . . ? 
F31 C15 F32 109.3(6) . . ? 
F31 C15 F33 111.5(7) . . ? 
F32 C15 F33 109.9(6) . . ? 
F31 C15 C13 110.4(5) . . ? 
F32 C15 C13 108.1(6) . . ? 
F33 C15 C13 107.6(6) . . ? 
F36 C16 F34 101.3(7) . . ? 
F36 C16 F35 111.2(7) . . ? 
F34 C16 F35 112.8(6) . . ? 
F36 C16 C13 113.1(6) . . ? 
F34 C16 C13 110.0(6) . . ? 
F35 C16 C13 108.4(7) . . ? 
F30A C14A F29 110(3) . . ? 
F30A C14A F28 116(2) . . ? 
F29 C14A F28 112.1(18) . . ? 
F30A C14A C13 106(3) . . ? 
F29 C14A C13 111.9(16) . . ? 
F28 C14A C13 100.3(15) . . ? 
F30A C14A F33 21.3(19) . . ? 
F29 C14A F33 127.5(14) . . ? 
F28 C14A F33 112.1(10) . . ? 
C13 C14A F33 86.3(13) . . ? 
F34 C16A F35A 108.5(13) . . ? 
F34 C16A F36 103.3(13) . . ? 
F35A C16A F36 124.5(12) . . ? 
F34 C16A C13 108.5(11) . . ? 
F35A C16A C13 114.5(14) . . ? 
F36 C16A C13 96.1(9) . . ? 
F31 C15A C13 103.2(11) . . ? 
F31 C15A F32 88.2(10) . . ? 
C13 C15A F32 102.5(13) . . ? 
C14A F30A F33 140(4) . . ? 
C14A F30A F29 38.9(17) . . ? 
F33 F30A F29 159(2) . . ? 
 
_diffrn_measured_fraction_theta_max    0.772 
_diffrn_reflns_theta_full              25.93 
_diffrn_measured_fraction_theta_full   0.772 
_refine_diff_density_max    1.237 
_refine_diff_density_min   -0.710 
_refine_diff_density_rms    0.088

#===END
